# Supplementary material for: Introducing point-of-care ultrasound (PoCUS) to first-year graduate-entry medical students: a mixed methods feasibility study
Source: Research Square preprint supplement (doi:10.21203/rs.3.rs-7448244/v1), 2025-10-17
Supplement: Supplementary file 1 [file b61fe366b2f1373f98a58c1b.docx]

| *Theme* | Subtheme | Representative quotes |
| --- | --- | --- |
| Learner experience | Learner preferences | - It would be better if we have some interactive software where we can interact and kind of see “oh this is what the ultrasound looks like when you increase the gain and decrease the gain or the depth.” (P7) - I find it beneficial if there was almost some sort of self-study or some practice questions that could be incorporated… did I actually understand what I just read? (P6) - It would also be helpful to really show normal structures as well prior to beginning pathology… when I walked in it just all looked like gray and black splotches, so it was a really good introduction into beginning to identify different structures because they look very unique on ultrasound (P5) |
| Fidelity of simulation environment | - I think the VR model is good for that conceptual idea of where the ultrasound beam is going and that planer understanding. You do have that side by side view.  I feel as an introductory thing to say “okay, this is what we're looking at side by side in this plane, that plane, etc., etc.” it's a great start that you can then apply that theoretical conceptual understanding to the actual surface model. (P1) - The surface model part was by far the most helpful and the most useful and the most interesting. (P5) - I just didn't like the virtual reality one at all, that was fair to detached from reality. I much prefer just using the surface model and getting to grips with what it's really like. (P9) - Say for example the Morrison's Pouch between the kidney and the liver in the simulation often has this weird gap to it whereas in real life they're right next to one another. (P8) |
| Curriculum integration | Appropriate modules | - I think there's definitely many points in our curriculum where I think it could be very smoothly integrated. (P6) - I think it'd be great if it was introduced in the likes of the radiology and anatomy, because there is an ultrasound machine, but it was never turned on. It’d be great while we're doing the abdomen to be doing ultrasound, to see what you can see, and just having a go of it, and then even introducing it into COWs (case of the week) (P9) - I don't think you need to truly understand DVT weeks before you use ultrasound. (P5) |
| Timing of introduction | - I think you need to know how to cannulate before using the ultrasound… that's an extra level up, because you've got to master that skill before adding in the ultrasound. (P3) - We can't learn everything in our first year of medicine, and this just seems like one of those skills that, it seems like we do learn in future years in terms of cannulation and everything, and from the purposes of curriculum structure, I think this is where I could see it being spread out over a longer period of time (P6) |
| Integration, not addition | - I would say on our busiest weeks, we have probably, I don't even want to count how many hours of lecture, but an addition of something that is such a hands-on skill, I would wonder about the cognitive capacity of anyone after three hours of inhaling formaldehyde. (P6) - I think they should do it from the first anatomy session because it just ties in so well with it. (P10) |
| Clinical practice | Experiences from placements | - For an intern that's trying to get a line in for someone with bad access, like that's where it's useful (P9) - There was like one or two times where I was like, oh my gosh, POCUS would be so useful right now. Like these doctors are so capable and would answer this question right here, right now, if they were like well trained and could do POCUS appropriately and it just wasn't an option at this hospital that I was at." (P5) - Our consultant was very keen on using it… I saw him visualising the structures and also the areas that are prone to, for example, if a patient has a pleural effusion, where to look for free fluid in the pleural space. And the way he approached it, you can clearly see with experienced hands, with the right angle, you can actually visualise the abnormality quite easily. (P7) - It's almost like a bad word in cardio. Like as a joke, yeah, but... they're going to have an echo anyways. So, what's the point?"" (P10) - I was in cardiology at a different hospital and POCUS was also a foreign concept, it just didn't serve any utility, there was better imaging modalities, more specific ones…” (P6) |
| Governance | Limitations | - It is a powerful technology that needs to be used correctly.  They need to use it in the right situations, not just let me have a look at and see what I can find. (P8) - If you don't see an abdominal aortic aneurysm, you can't be certain that there's not one there, just because you don't see it. (P11) - I think people can be quite gung-ho with especially like a newer technology or one that's used in a different way, and it was really important for us to know we can't just scan everyone and take what we find is like written. Because… especially in amateur hands it's not the best (P3) |
| Applications | - I think before this, I wouldn't have thought that. I would have thought everyone can use it. It's going to be great. But now after the teaching and after the experience with it, I think now I have a better understanding of where it's best used” (P10) - My kind of takeaway is, I've always liked this imaging modality, with this, I believe that yes, it is not accurate all the time, but if there is more training with POCUS and with the advancement of ultrasound… it's only good to get better with the technology … So, my takeaway is we actually need more training." (P7) - The decision-making of when to using imaging using the ALARA principle… so that kind of starts to fall apart when you think of PoCUS, or at least on first glance… because it's relatively harmless and non-invasive, why not just use it on everybody? And then, no, you actually should be a lot more critical in your decision process.” (P6) |

**Table 5:** Themes and sub-themes from thematic analysis of focus-group transcript. P reflects participant number from the transcript.
